# Supplementary material
Source: Springer Nature journal article supplement (https://www.springermedizin.de/resource/supplementary/12916_2007_154_MOESM7_ESM.pdf/9599280)
Supplement: MOESM7 [file 9599280]

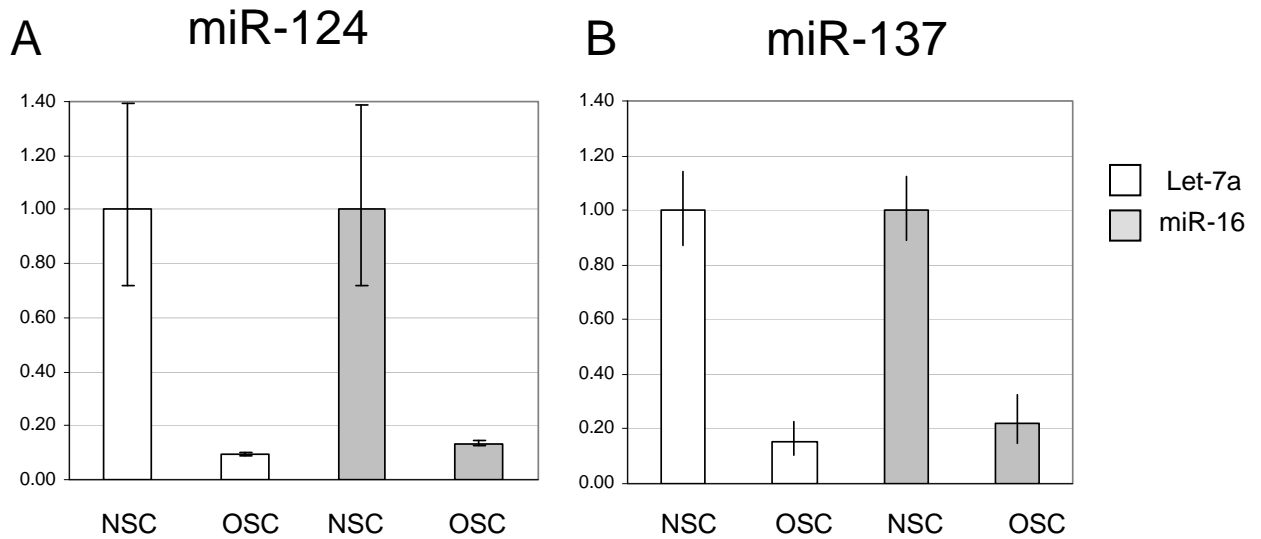

**Additional file 7 (Supplementary figure 3) Assessment of miR-124a and miR-137 expression in mouse oligodendroglial stem cells.** miR-124 (A) and miR-137 (B) are downregulated in mouse oligodendroglial stem cells (OSCs) relative to wild type mouse neural stem cells (NSCs). miR-124 and miR-137 expression was measured relative to control miRs let-7a and miR-16.
